# Supplementary material for: Fabrication of Transparent and Conductive SWCNT/SiO2 Composite Thin-Film by Photo-Irradiation of Molecular Precursor Films
Source: Nanomaterials (Basel). 2021 Dec 16;11(12):3404. doi: 10.3390/nano11123404 (PMC8707605; doi:10.3390/nano11123404)
Supplement: Supplementary file 1 [file nanomaterials-11-03404-s001.zip › nanomaterials-1471955-supplementary.pdf]

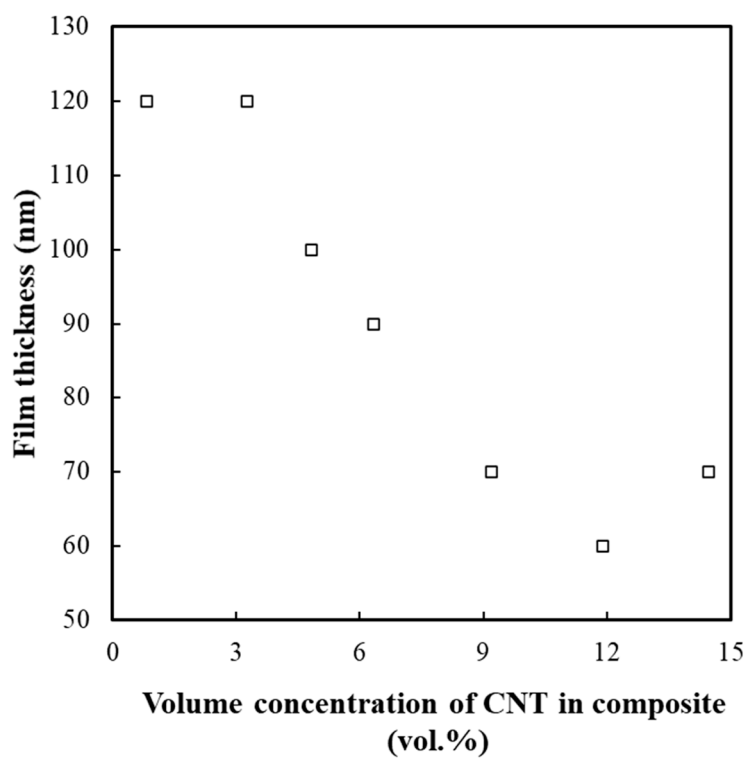

**Supplementary Figure S1.** Relationship between the film thickness of the SWCNT/SiO<sub>2</sub> composite thin films (**Fa–Fg**) and their volumetric fraction of SWCNT in each film. A stylus profilometer was used to measure the film thicknesses of **Fx**.

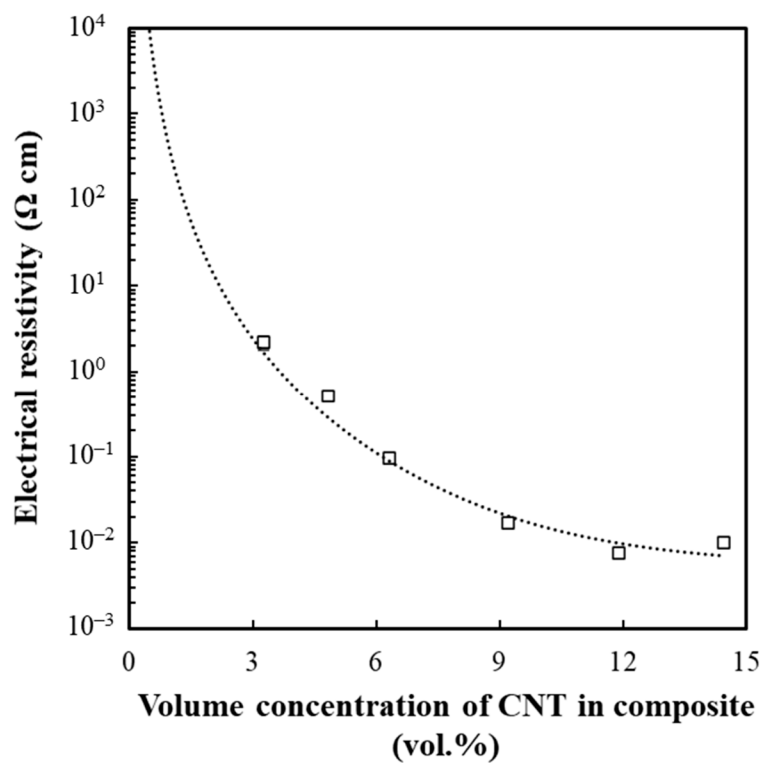

**Supplementary Figure S2.** Relationship between the electrical resistivity of the SWCNT/SiO<sub>2</sub> composite thin films (**Fb–Fg**) and their volumetric fraction of SWCNT in each film. The electrical resistivity of **Fb–Fg** at 25 °C was determined using four-probe method and film thickness. The plot of **Fa** was removed from the figure because the value is  $>10^3 \Omega$  cm.

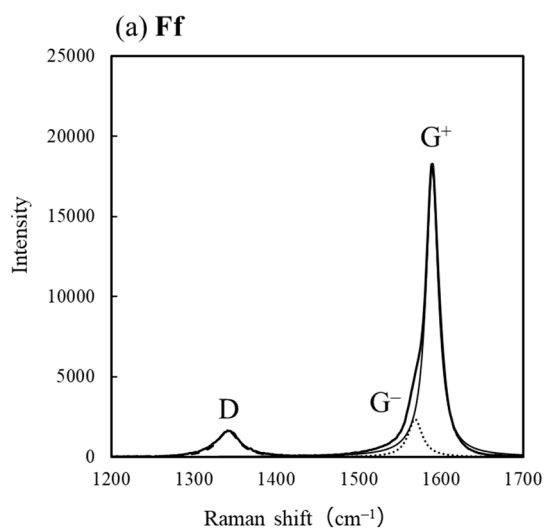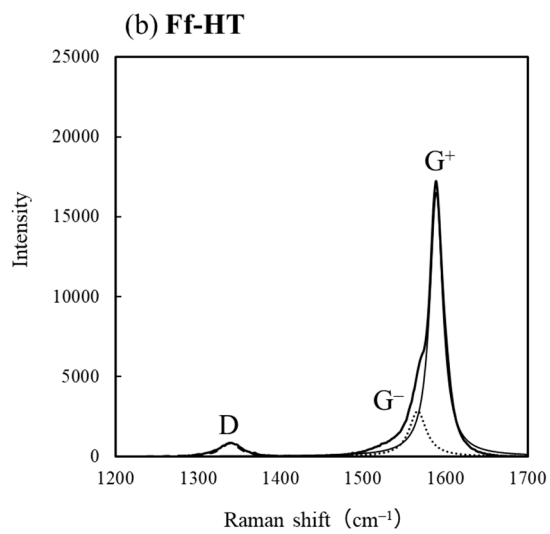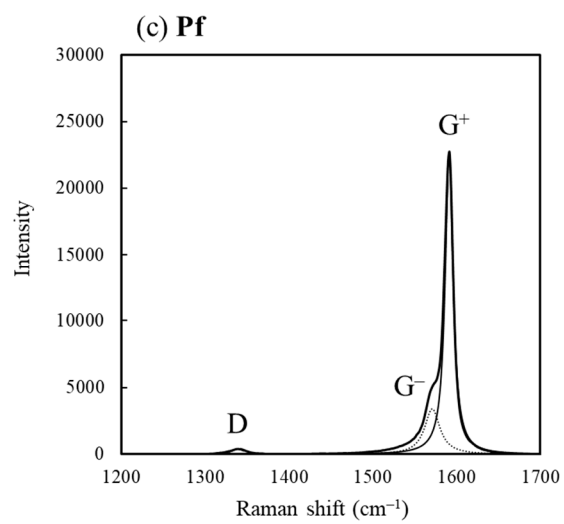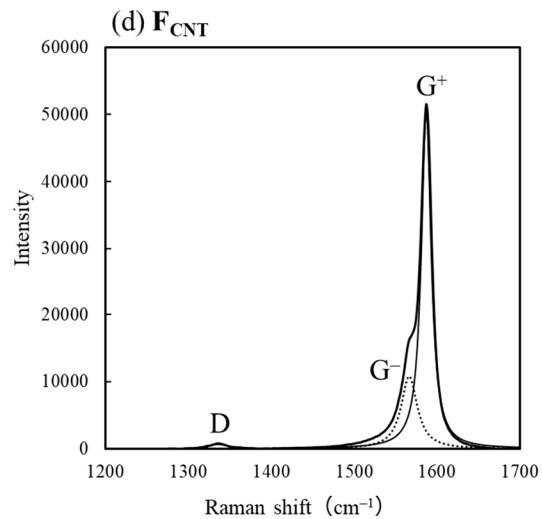

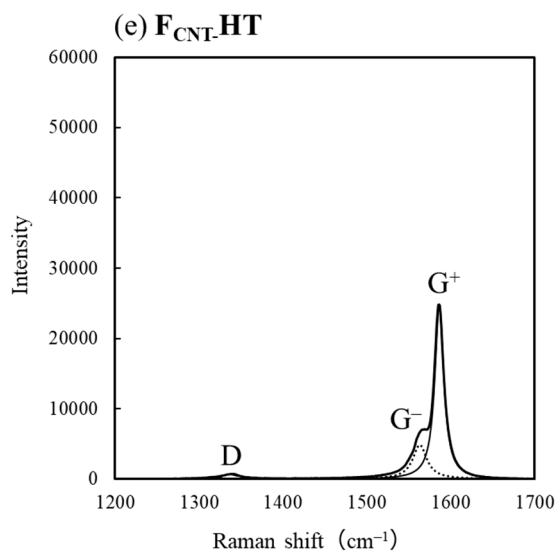

**Supplementary Figure S3.** Deconvoluted Raman peaks of the obtained thin films, (a) **Ff**, (b) **Ff-HT**, (c) **Pf**, (d),  **$F_{\text{CNT}}$** , and (e)  **$F_{\text{CNT-HT}}$** , along with each original spectrum in the range of 1200-1700  $\text{cm}^{-1}$ . The thick line indicates the observed spectra, while three lines, (---), (•••), and (—) indicate the theoretically fitted curves assignable the D,  $G^-$ , and  $G^+$  bands, respectively. All the calculated curves completely overlapped the corresponding observed curves.

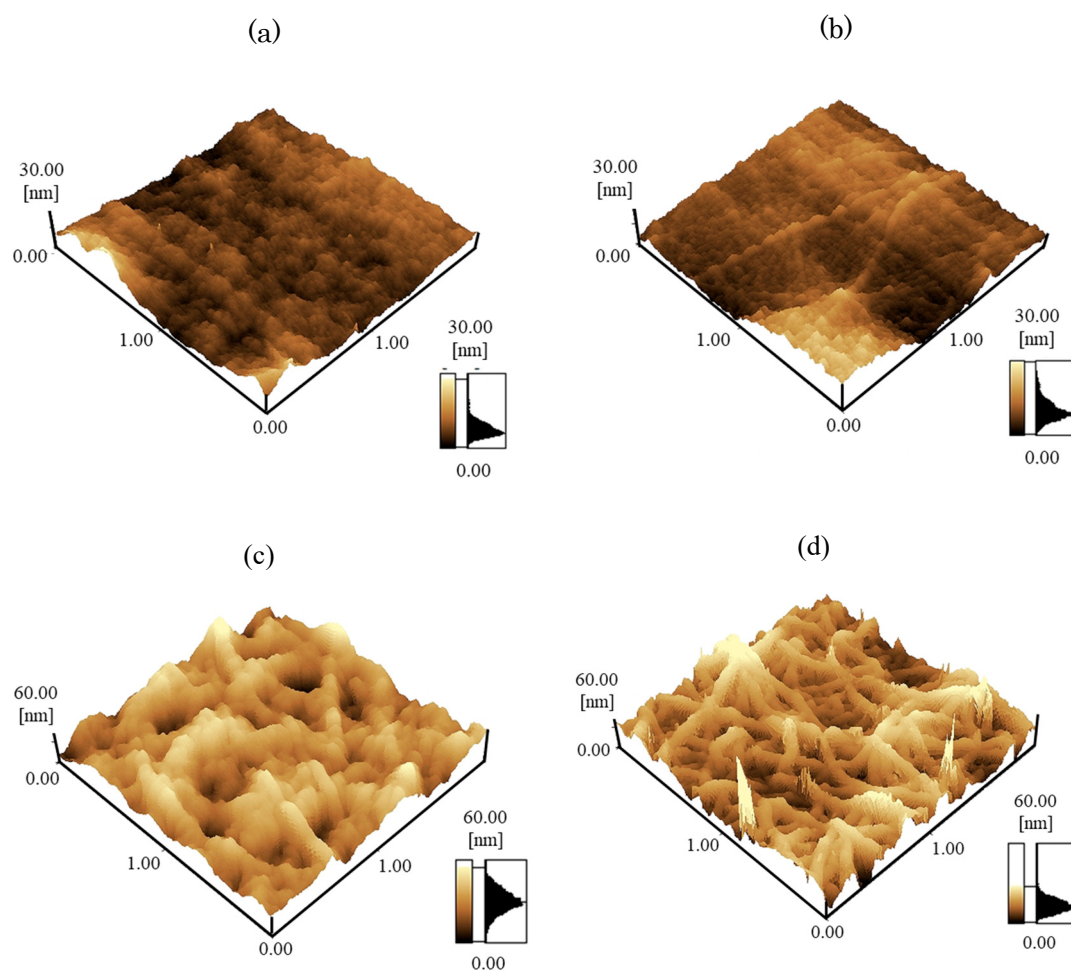

**Supplementary Figure S4.** Three-dimensional (3D) AFM images of (a) **Ff**, (b) **Ff-HT**, (c) **FCNT**, and (d) **FCNT-HT** obtained by scanning each  $2 \times 2 \mu\text{m}^2$  area.
